# Supplementary material for: Genome-wide association and epidemiological analyses reveal common genetic origins between uterine leiomyomata and endometriosis
Source: PubMed Central journal article supplement (PMC6813337; doi:10.1038/s41467-019-12536-4), 2019-10-24
Supplement: 41467_2019_12536_MOESM3_ESM.pdf [file 41467_2019_12536_MOESM3_ESM.pdf]

## Description of Additional Supplementary Files

**Supplementary Data 1. LD Hub analysis.** LD Hub analysis was performed for various cardiometabolic, anthropometric, glyceimic, blood lipids and reproductive diseases/traits.

**Supplementary Data 2. DEPICT analyses.** Independent loci identified from 8,971 SNPs with suggestive ( $P < 1 \times 10^{-5}$ ) or significant associations ( $P < 5 \times 10^{-8}$ ) for DEPICT analyses.

**Supplementary Data 3. Gene-set enrichment analysis.** Significant ( $FDR < 0.05$ ) gene-sets determined from DEPICT-based gene-set enrichment analysis of 104 independent lead SNPs identified from 8,971 SNPs with suggestive ( $P < 1 \times 10^{-5}$ ) or significant associations ( $P < 5 \times 10^{-8}$ ).

**Supplementary Data 4. Summary-data based Mendelian Randomization (SMR) using eQTL data from peripheral blood.** This table includes all significant hits according to the SMR test suggesting a causal/pleiotropic association between the variant, disease risk, and gene expression. All hits that also passed the HEIDI test (test for heterogeneity) are highlighted in yellow.

**Supplementary Data 5. Summary-data based Mendelian Randomization (SMR) using mQTL data from peripheral blood.** This table includes all significant hits according to the SMR test suggesting a causal/pleiotropic association between the variant, disease risk, and gene methylation. All hits that passed also the HEIDI test (test for heterogeneity) are highlighted in yellow.

**Supplementary Data 6. Top 10,000 genetic variants from the UL GWAS meta-analysis.** Summary statistics for 10,000 genetic variants from the METAL meta-analysis of WGHS, NFBC, QIMR, UKBB and 23andMe. CHR = Chromosome; BP = base pair position; A1 = reference allele; A2 = alternate allele; BETA = effect size w/ respect to A1; BETA\_SE = standard error of beta; P = significance of association; Freq1 = frequency of A1 allele; FreqSE = standard error of Freq1; HetISq = heterogeneity I-squared parameter; HetChiSq = heterogeneity chi-squared statistic; HetDf = heterogeneity degrees of freedom; HetP = significance of heterogeneity.
